# Supplementary material for: Novel circRNA_0071196/miRNA-19b-3p/CIT axis is associated with proliferation and migration of bladder cancer
Source: PubMed Central journal article supplement — Int J Oncol. 2020 Jul 3;57(3):767–79. doi: 10.3892/ijo.2020.5093 (PMC7384843; doi:10.3892/ijo.2020.5093), 2020-07-03

Figure S1. Deregulated circRNAs in BCa tissues (T) and adjacent normal tissues (C). (A) Box plot showing variations in circRNA expression levels. (B) Scatter plot of circRNAs, with values on the x- and y-axes indicating the averaged normalized values (log<sub>2</sub>-scaled). (C) Classification of DEcircRNAs based on the genomic loci of their coding genes. (D) The distribution of DEcircRNAs across chromosomes. circRNAs, circulating RNAs; BCa, bladder cancer; DEcircRNAs, differentially expressed RNAs.

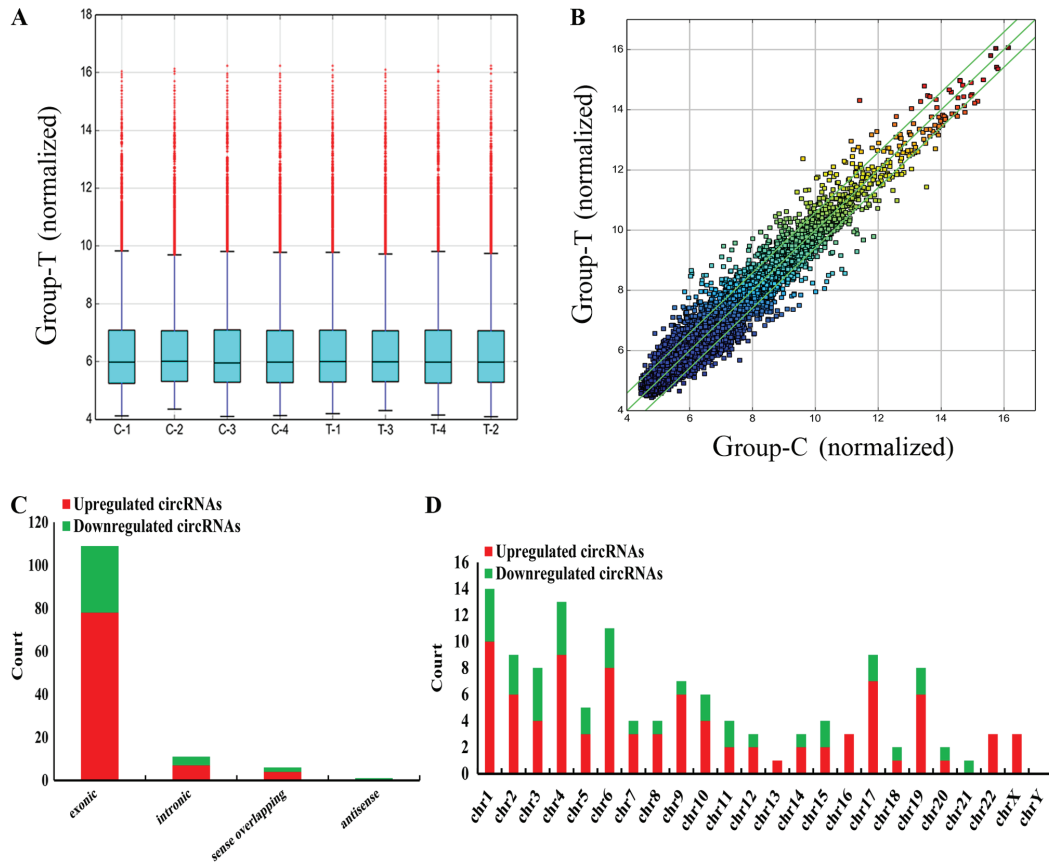

Figure S2. Deregulated mRNAs in in BCa tissues (T) and adjacent normal tissues (C). (A) Volcano plot showing the distribution of mRNAs. The red, green and black points represent the upregulated, downregulated and unchanged mRNAs respectively. (B) The location of DEGs in the different chromosomes. BCa, bladder cancer; DEGs, differentially expressed genes.

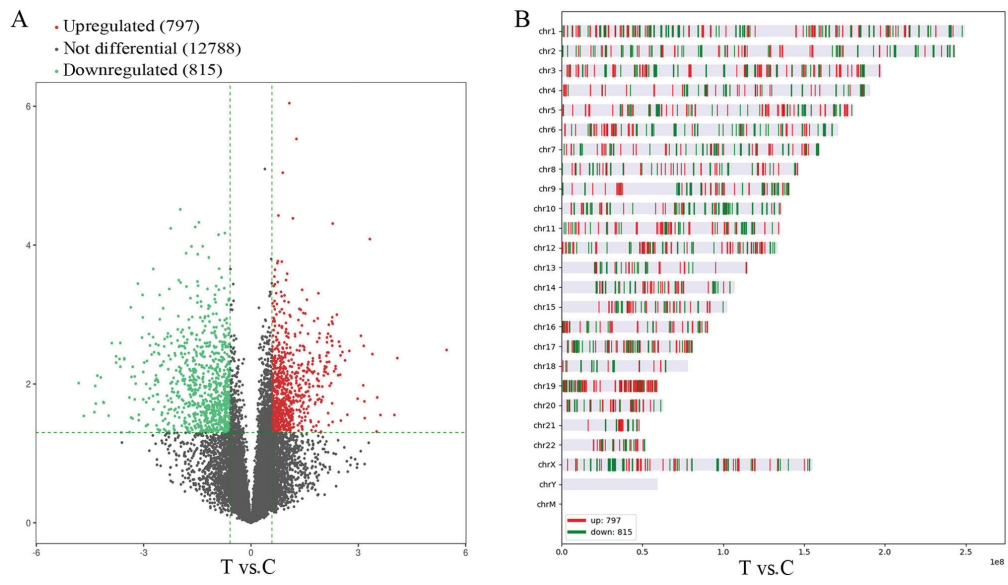

Supplement: Supplementary_Data.pdf [file Supplementary_Data.pdf]
